# Supplementary material
Source: PubMed Central journal article supplement (PMC4391816)
Supplement: NIHMS676817-supplement-supplement.pdf [file NIHMS676817-supplement-supplement.pdf]

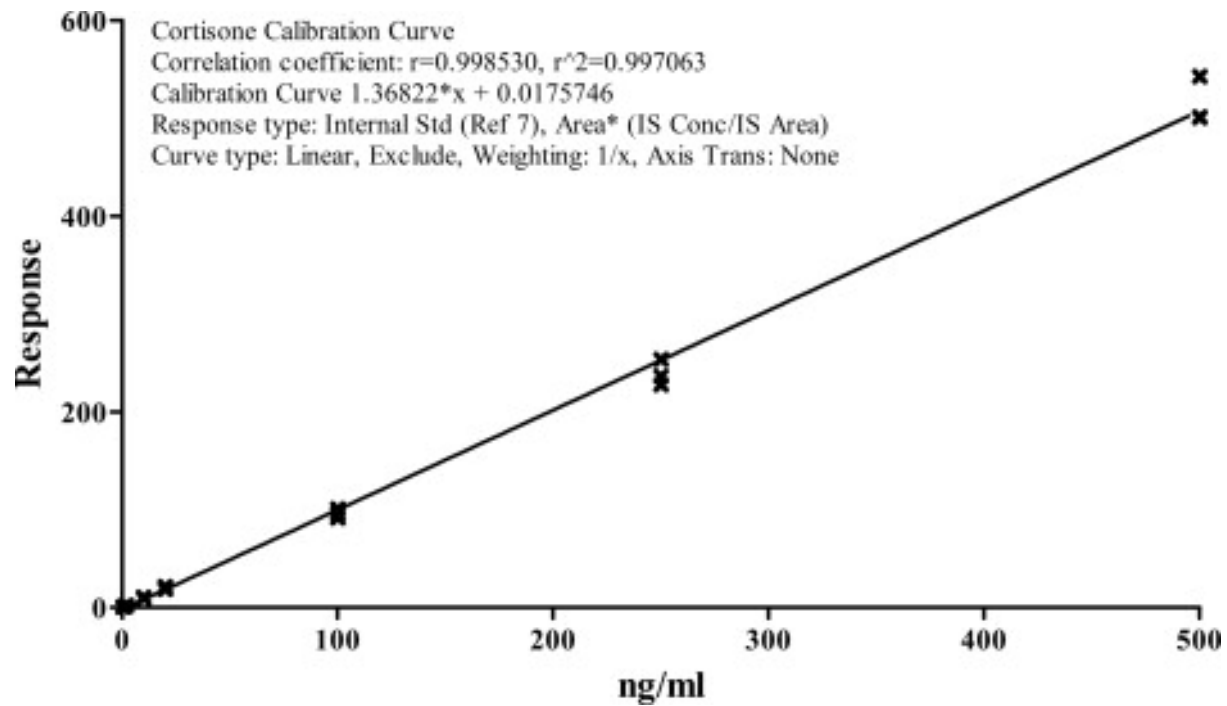

Carolyn J. Broccardo , Kevin L. Schauer , Wendy M. Kohrt , Robert S. Schwartz , James P. Murphy , Jessica E. Prens...

**Multiplexed analysis of steroid hormones in human serum using novel microflow tile technology and LC-MS/MS**

Journal of Chromatography B, Volume 934, 2013, 16 - 21

<http://dx.doi.org/10.1016/j.jchromb.2013.06.031>
